# Supplementary material for: Dehalogenation of diatrizoate using nanoscale zero-valent iron: impacts of various parameters and assessment of aerobic biological post-treatment
Source: Royal Society of Chemistry journal article supplement (doi:10.1039/c7ra03750c), 2017-01-01
Supplement: c7ra03750c1.pdf [file c7ra03750c1.pdf]

1  
2  
3  
4  
5  
6  
7  
8  
9  
10  
11  
12  
13  
14  
15  
16  
17  
18  
19  
20  
21  
22  
23  
24  
25

## Supplementary information

### **Dehalogenation of diatrizoate using nanoscale zero-valent iron: impacts of various parameters and assessment of aerobic biological post-treatment**

Pan-Pan He, Chuan-Shu He, Qi Liu, Yang Mu\*

CAS Key Laboratory of Urban Pollutant Conversion, Collaborative Innovation Centre of Suzhou Nano Science and Technology, Department of Chemistry, University of Science and Technology of China, Hefei, China

#### **\*Corresponding author:**

Prof. Yang Mu, Fax: +86 551 63607907; E-mail: yangmu@ustc.edu.cn

**There are 7 pages in supporting information, including 1 table and 4 figures, detailed descriptions about the DABA sorption experiment.**

26 **DABA adsorption experiments by nZVI**

27 100 mL of 30  $\mu$ M DABA solution was added into a 150 mL serum bottle with  
28 pH at 7.0, then was purged with nitrogen for 15 min. Further, 0.05 g nZVI was added  
29 into the solution in the anaerobic operation box, and then the bottle was immediately  
30 sealed tightly with rubber stoppers and aluminum caps following with continuous  
31 shaking with 150 rpm at 25°C for 120 h by using a bath shaker.

**Table S1** Summary of LC-ESI-MS parameters for intermediates identification

|                             |       |
|-----------------------------|-------|
| Source Voltage (kV):        | 4     |
| Source Current (uA):        | 12.75 |
| Vaporizer Thermocouple OK:  | Yes   |
| Vaporizer Temp (C):         | 80    |
| Sheath Gas Flow Rate (arb): | 20.00 |
| Aux Gas Flow Rate(arb):     | 5.00  |
| Sweep Gas Flow Rate(arb):   | 0.02  |
| Capillary Temp OK:          | Yes   |
| Capillary Voltage (V):      | 35.00 |
| Capillary Temp (C):         | 275   |
| Tube Lens Voltage (V):      | 40    |

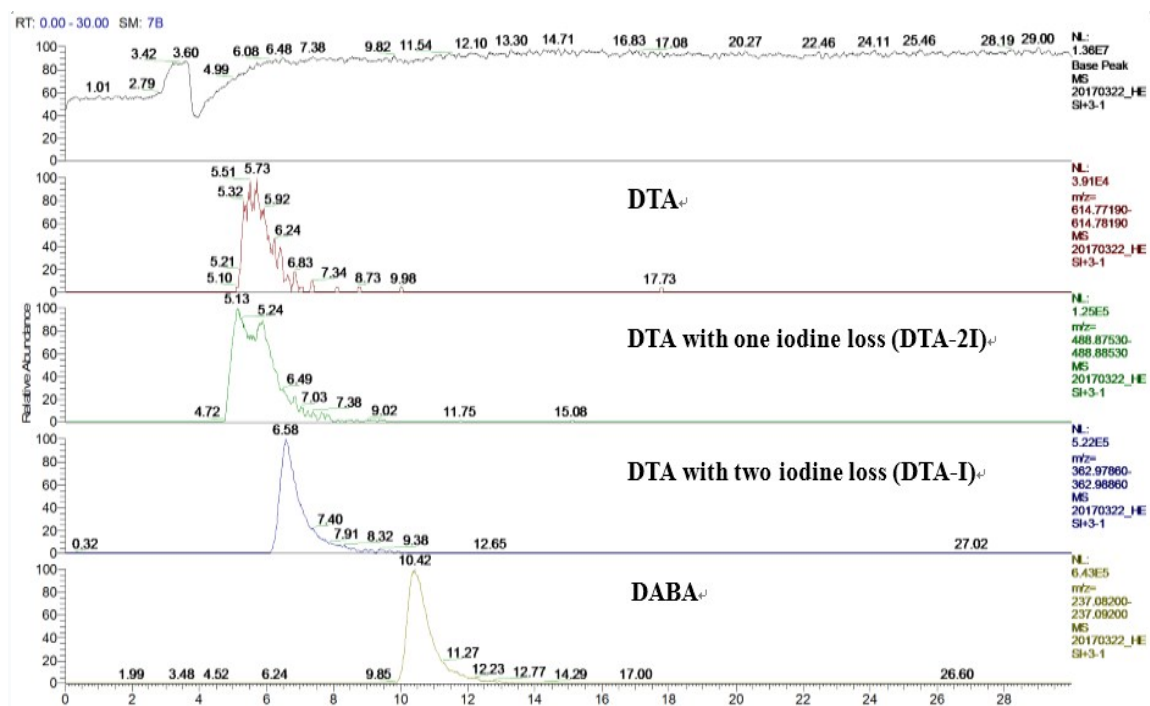

**Figure S1** Liquid chromatography of LC-ESI-MS for the identification of products from DTA dehalogenation using nZVI

20170322\_HESI+3-1#393 RT: 5.73 AV: 1 NL: 2.81E4  
T: FTMS+c ESI Full ms [100.00-800.00]

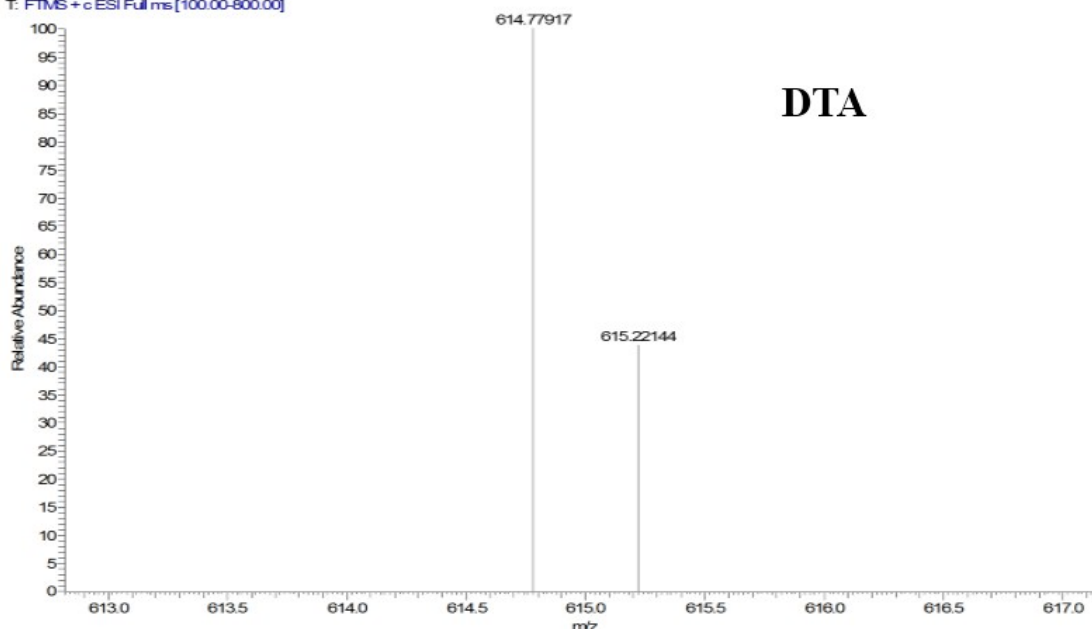

20170322\_HESI+3-1#352 RT: 5.13 AV: 1 NL: 1.74E5  
T: FTMS+c ESI Full ms [100.00-800.00]

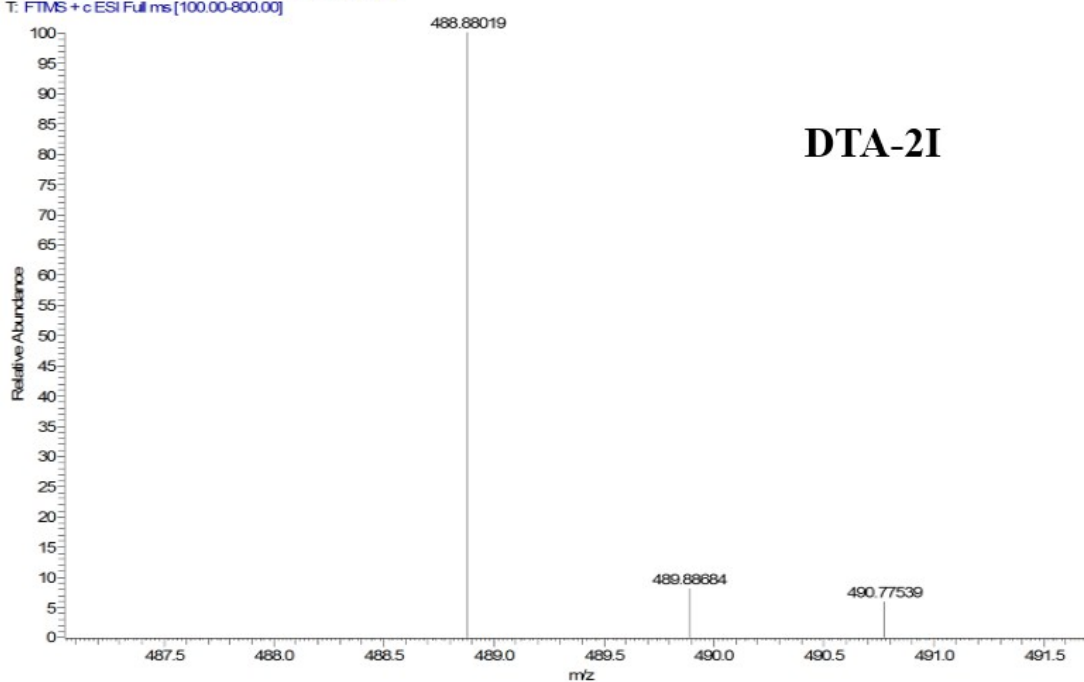

20170322\_HESI+3-1#454 RT: 6.62 AV: 1 NL: 5.30E5  
T: FTMS+ c ESI Full ms [100.00-800.00]

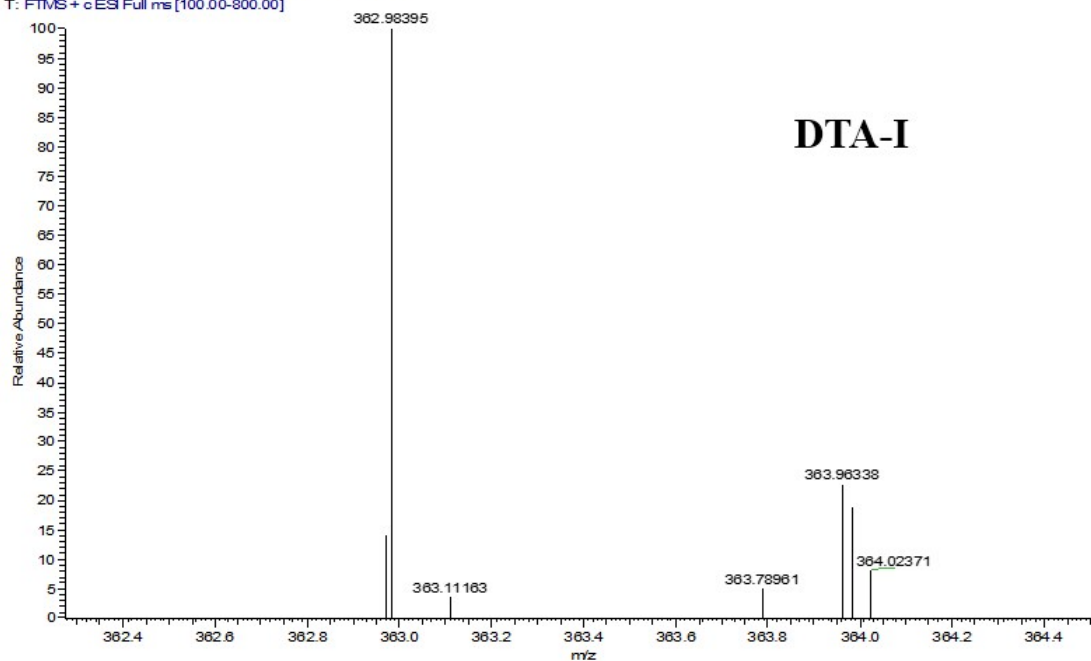

20170322\_HESI+3-1#726 RT: 10.59 AV: 1 SB: 2 0.01-0.02 NL: 5.42E5  
T: FTMS+ c ESI Full ms [100.00-800.00]

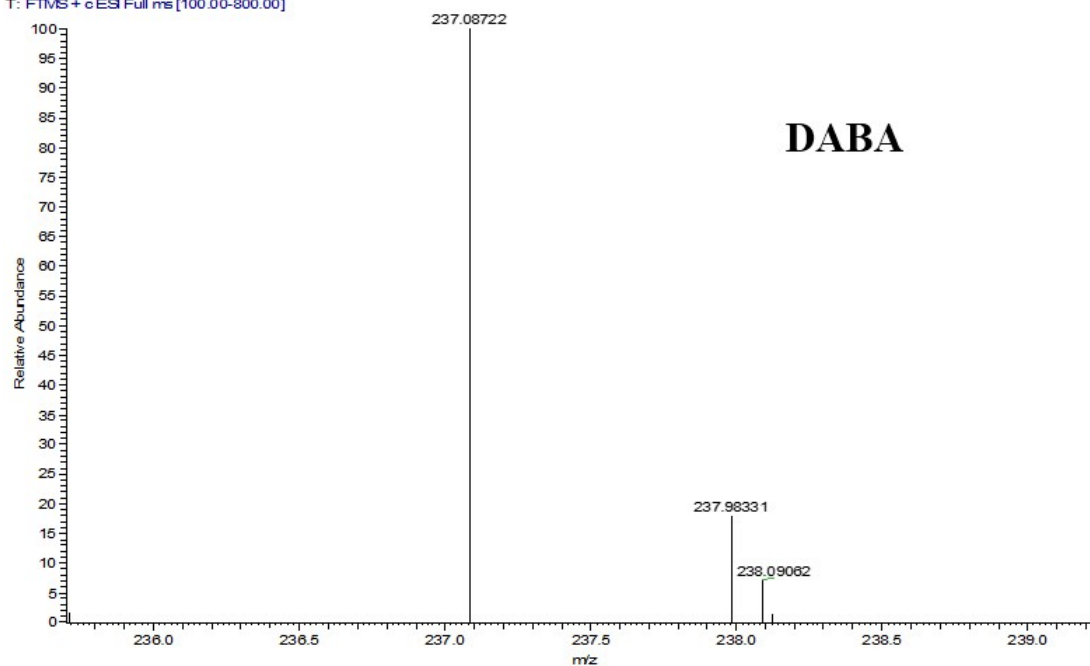

**Figure S2** Mass spectrometry of LC-ESI-MS for the identification of products from DTA dehalogenation using nZVI

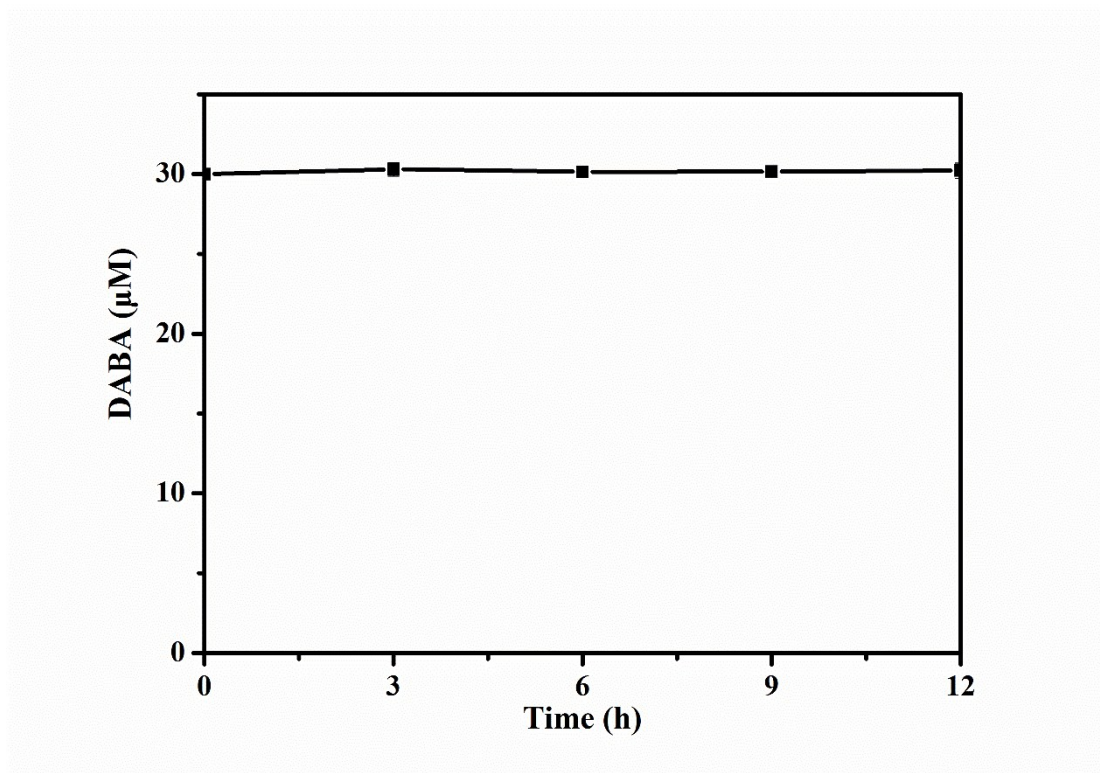

**Figure S3** Change of DABA concentration for DABA adsorption experiments by nZVI

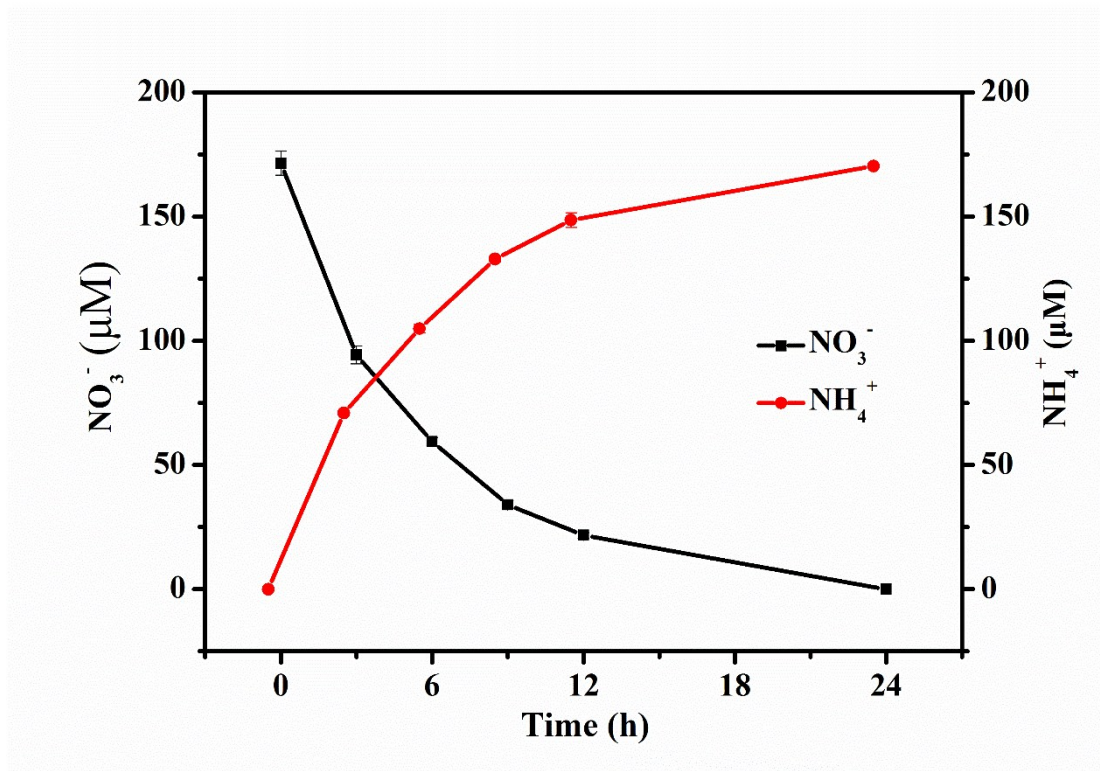

**Figure S4** Reduction of  $\text{NO}_3^-$  and formation of  $\text{NH}_4^+$  during DTA dehalogenation by nZVI in the presence of  $10 \text{ mg L}^{-1} \text{ NO}_3^-$ .
